# Supplementary material for: A new nanosensor for the chiral recognition of cysteine enantiomers based on gold nanorods
Source: Royal Society of Chemistry journal article supplement (doi:10.1039/c8nj02456a), 2018-01-01
Supplement: c8nj02456a1.pdf [file c8nj02456a1.pdf]

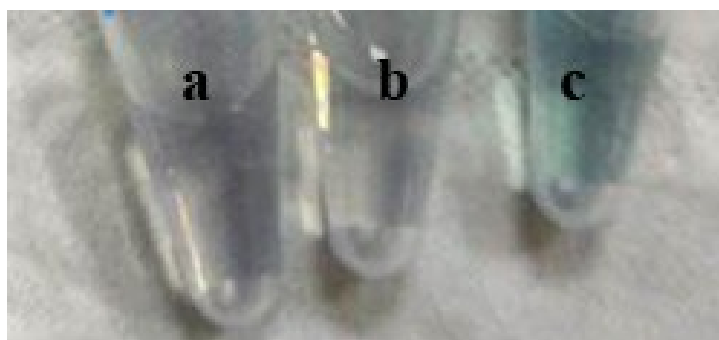

Fig S1. The photos of color (a) in the presence of 12.5  $\mu\text{M}$  D-Cys, (b) in the presence of 12.5  $\mu\text{M}$  L-Cys (c) GNRs.  $\text{Cu}^{2+}$ : 0.125 mM.
